# Supplementary figures and images for: Peptide-nucleic acids (PNAs) with pyrimido[4,5-d]pyrimidine-2,4,5,7-(1H,3H,6H,8H)-tetraone (PPT) as a universal base: their synthesis and binding affinity for oligodeoxyribonucleotides
Source: Royal Society of Chemistry journal article supplement (doi:10.1039/b821193k), 2009-01-01

1H  
intermediate  
of 3

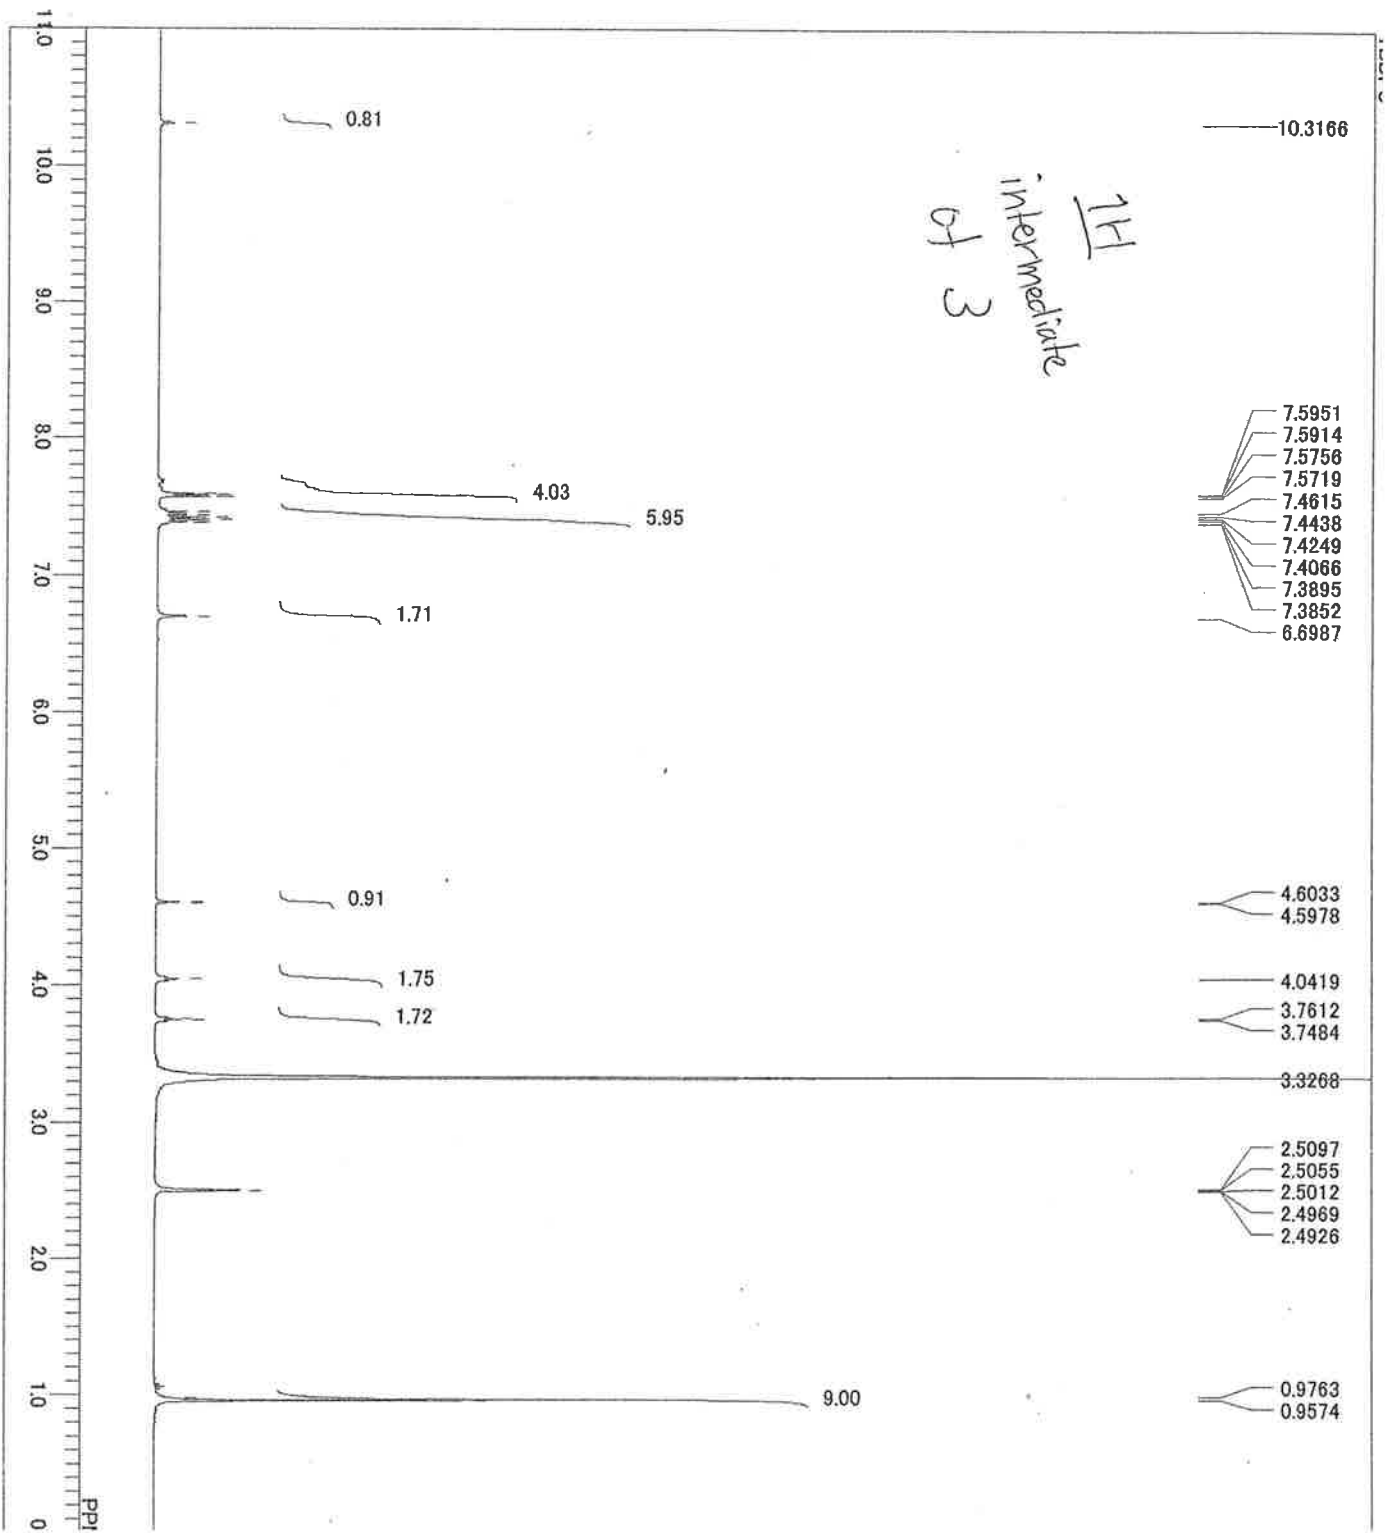

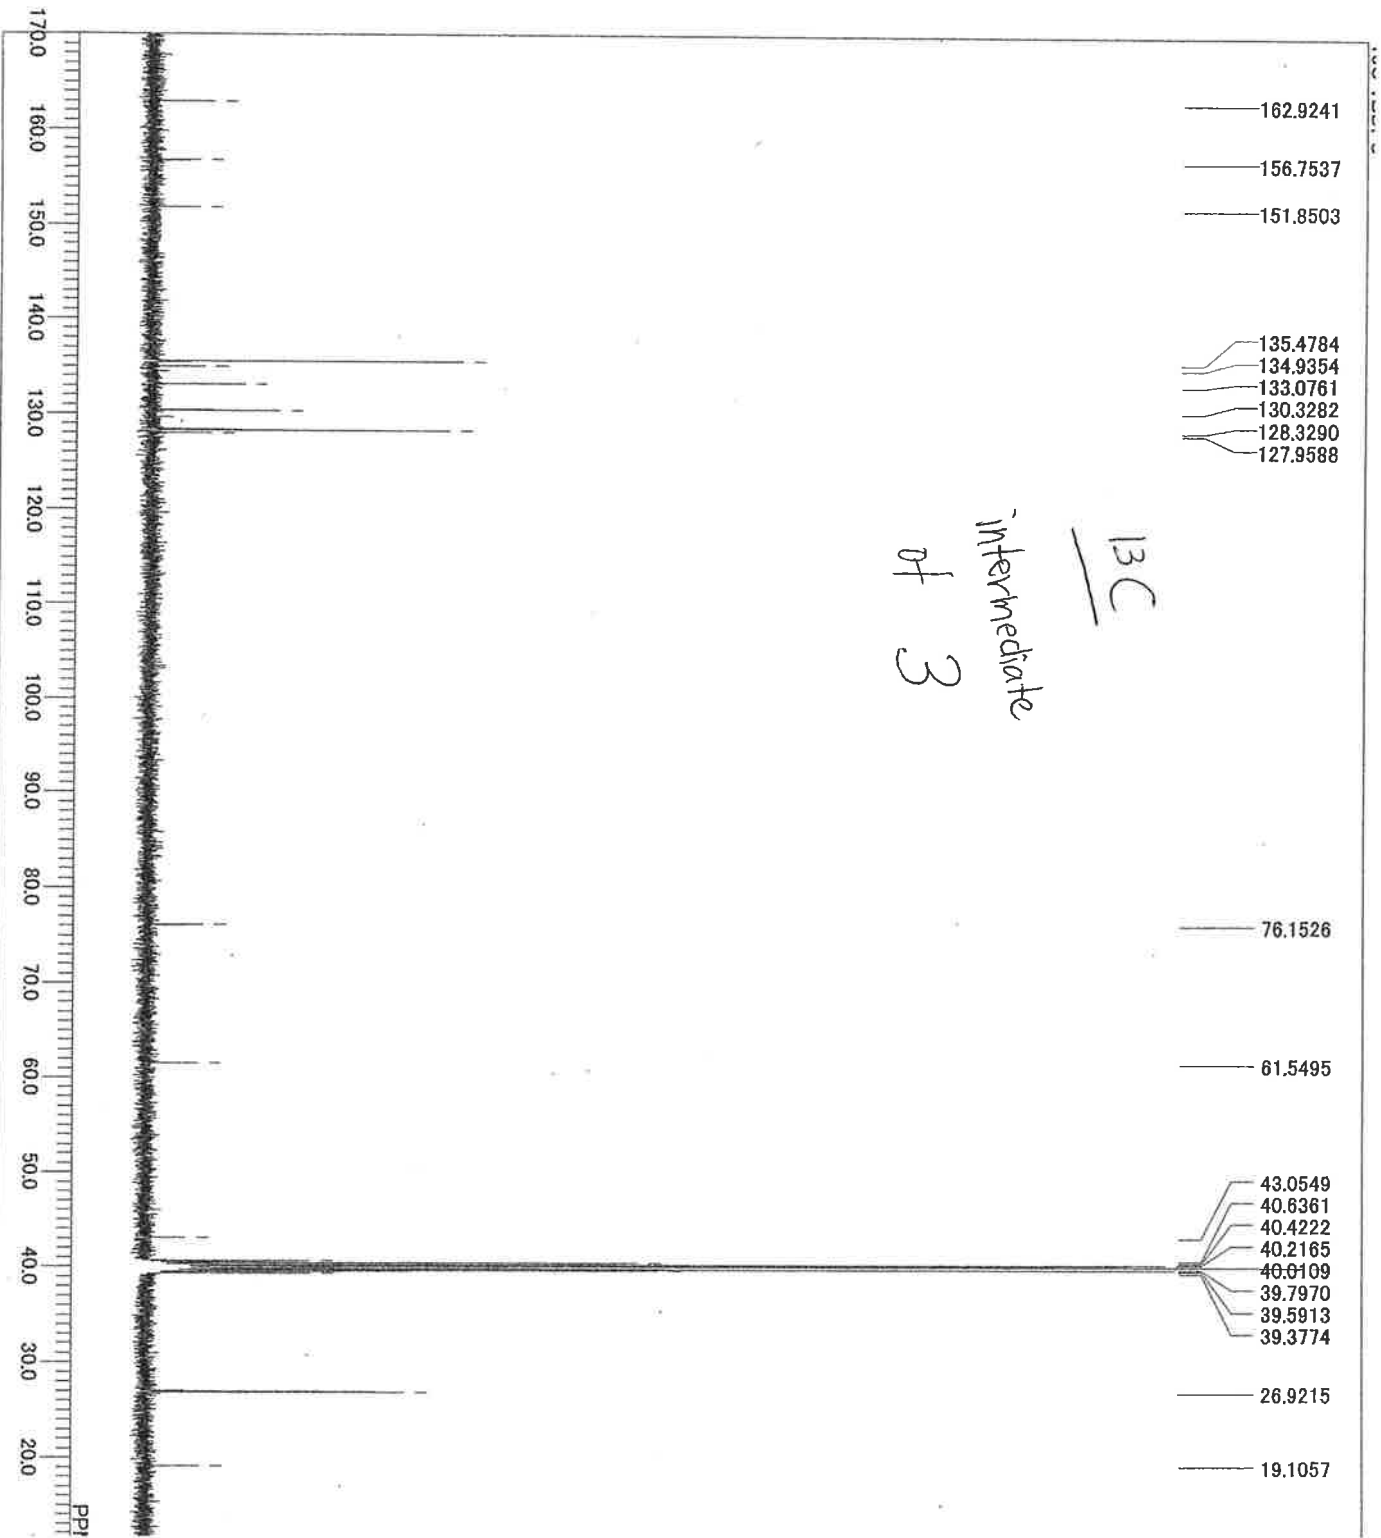

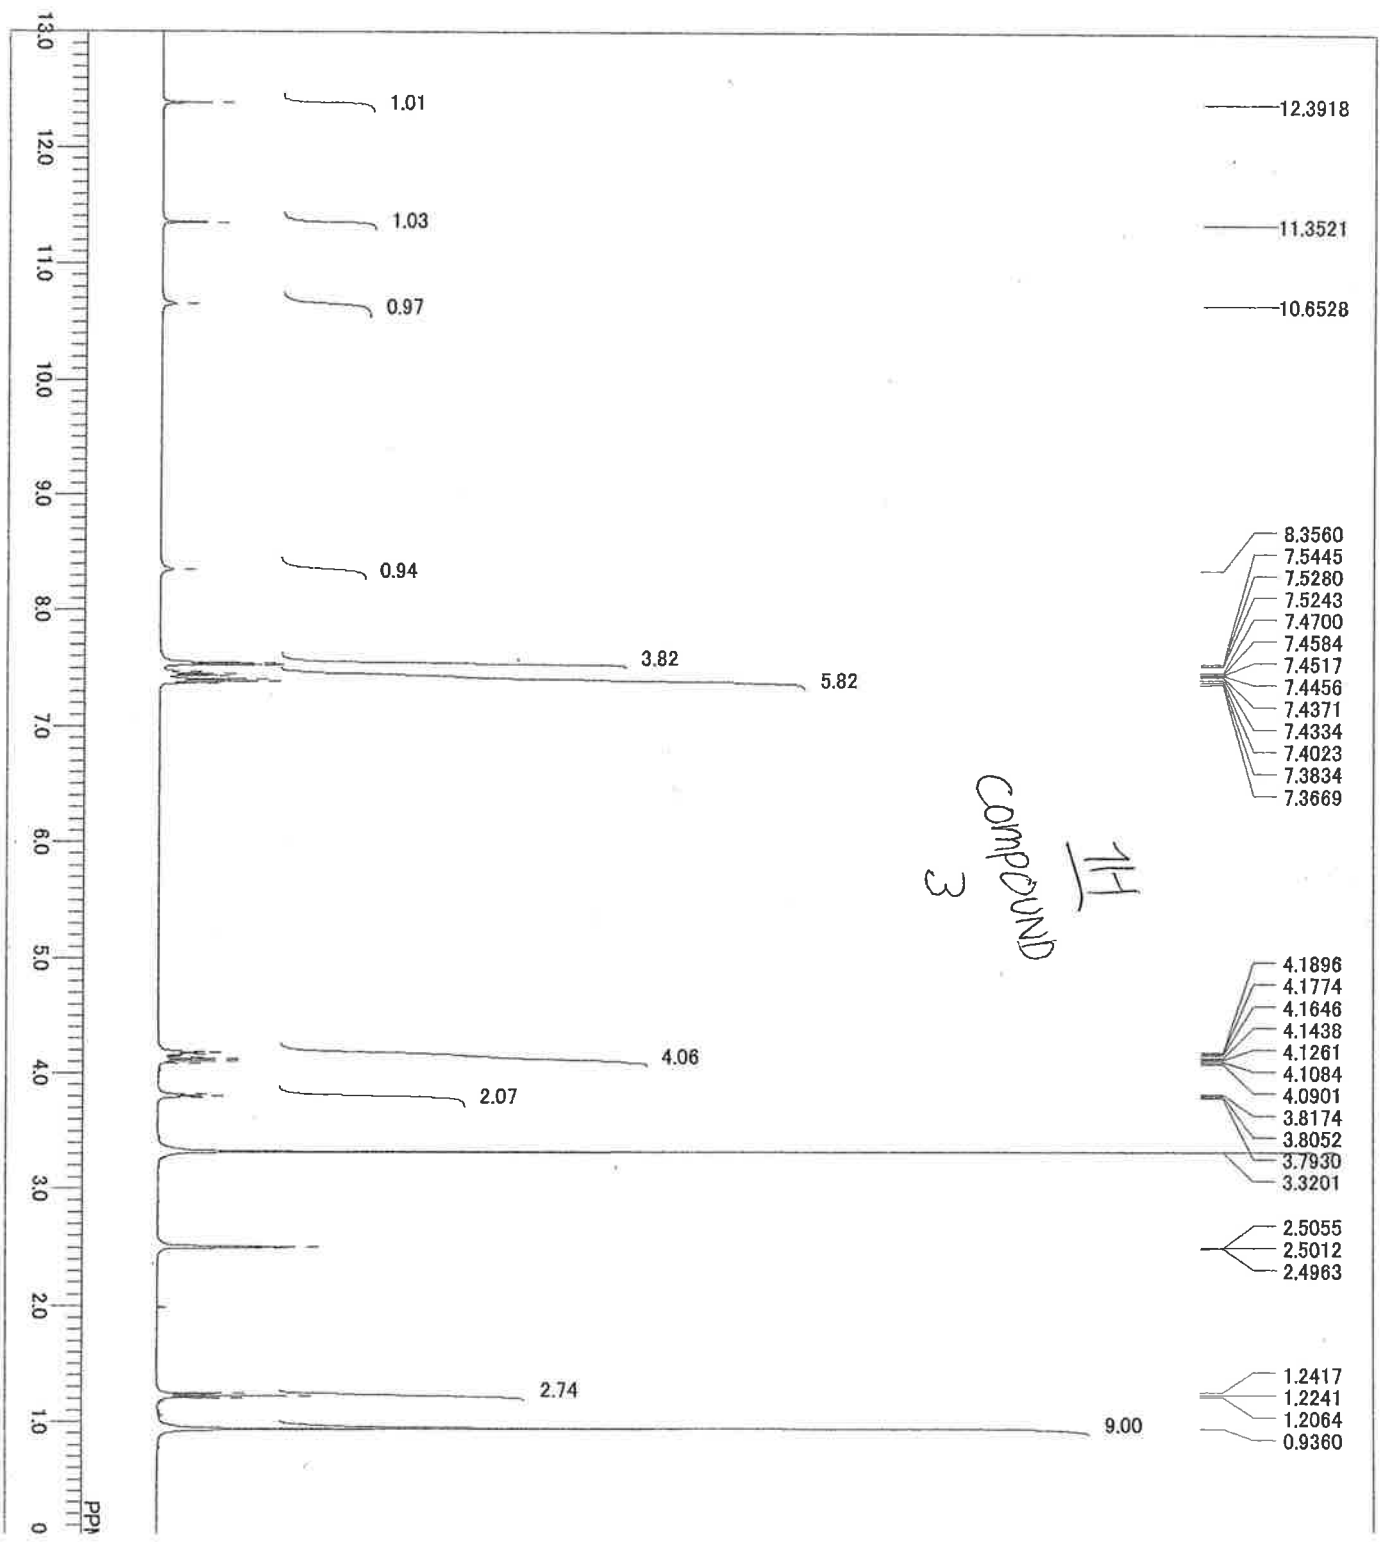

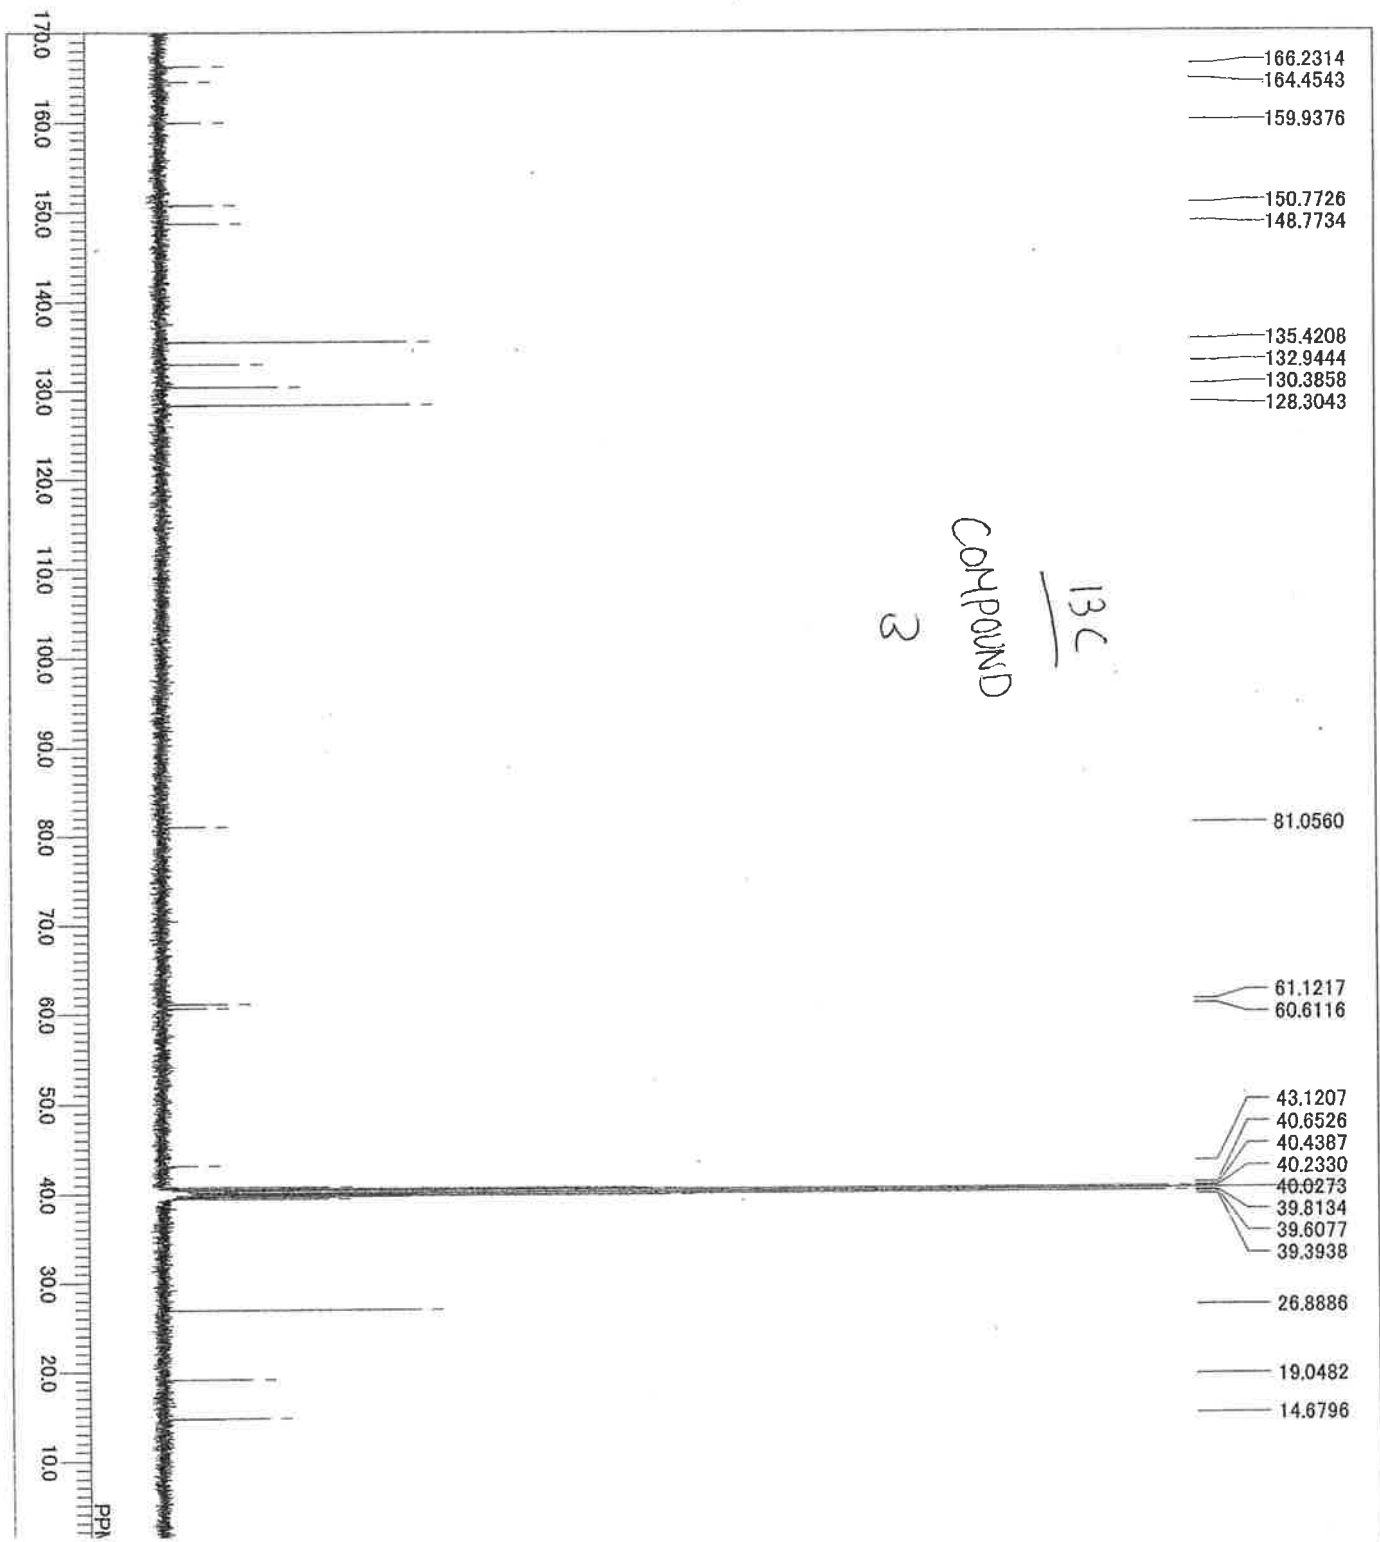

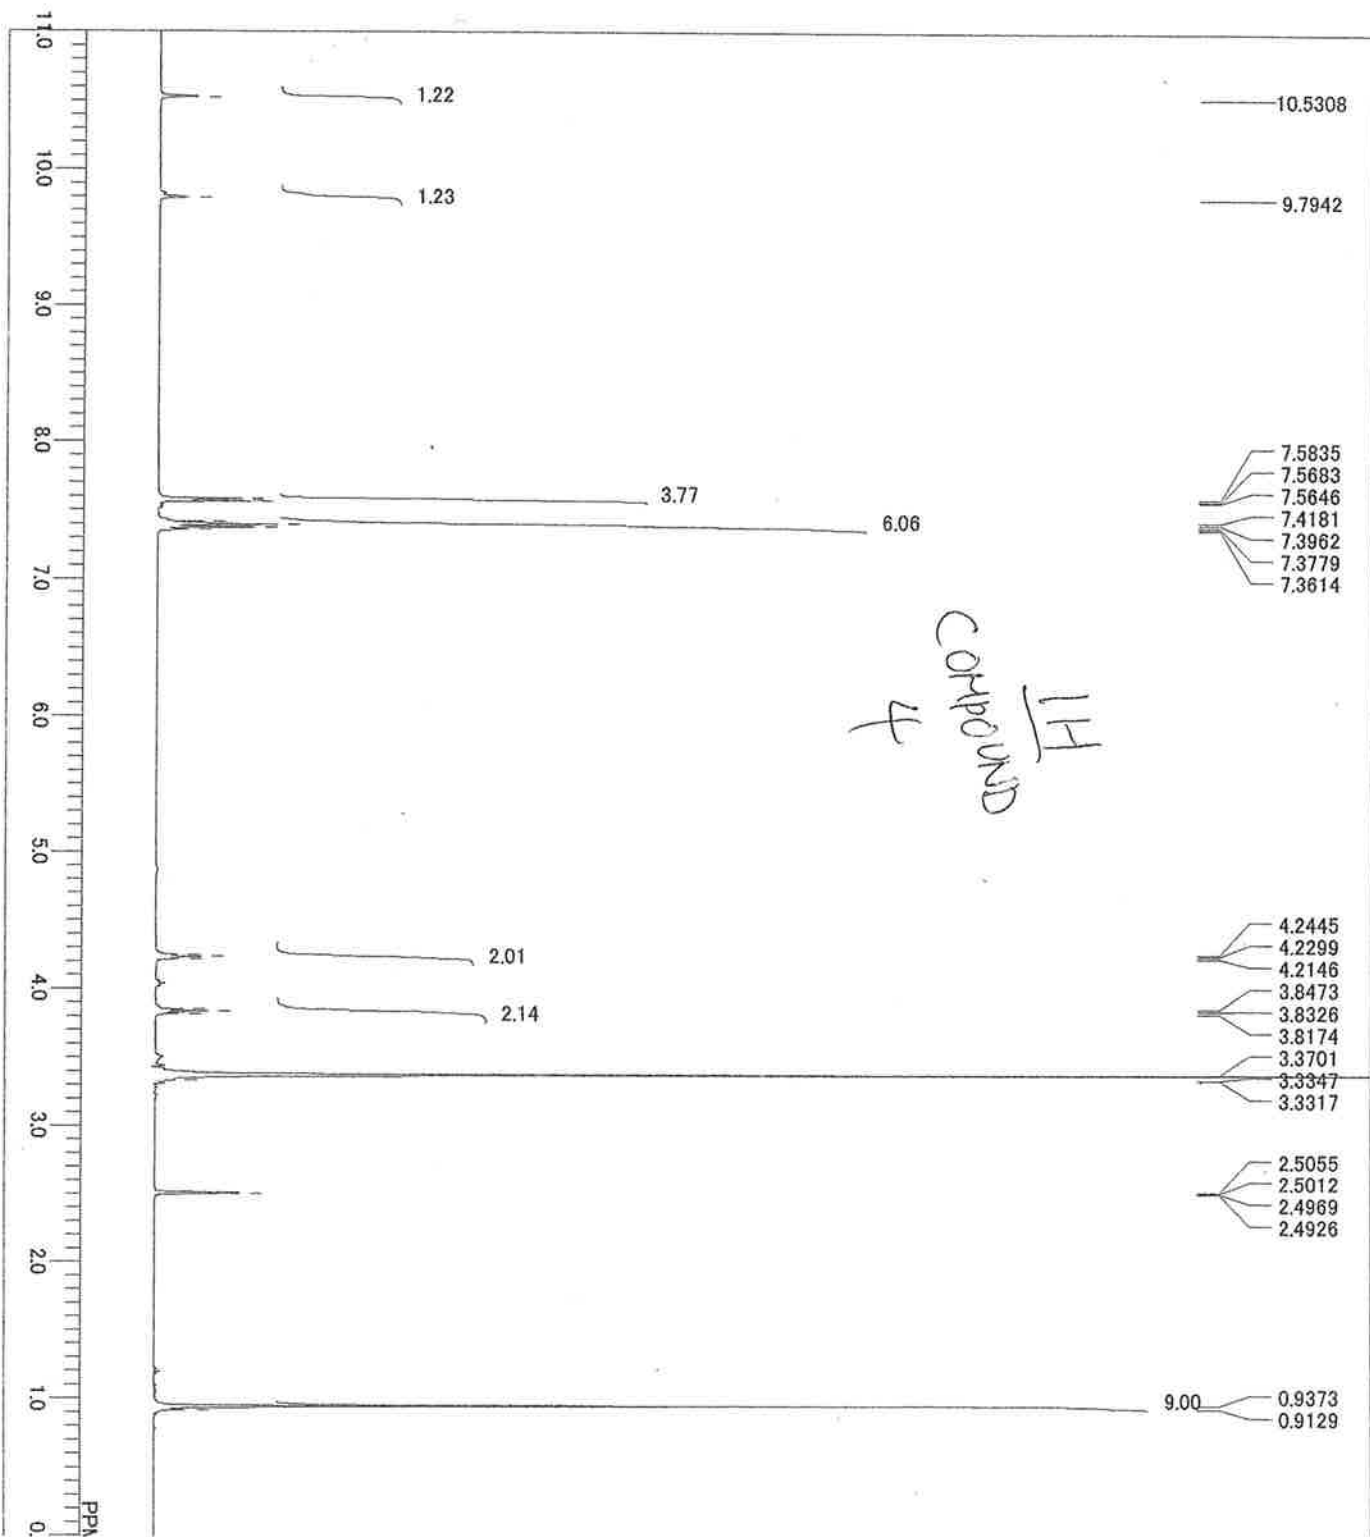

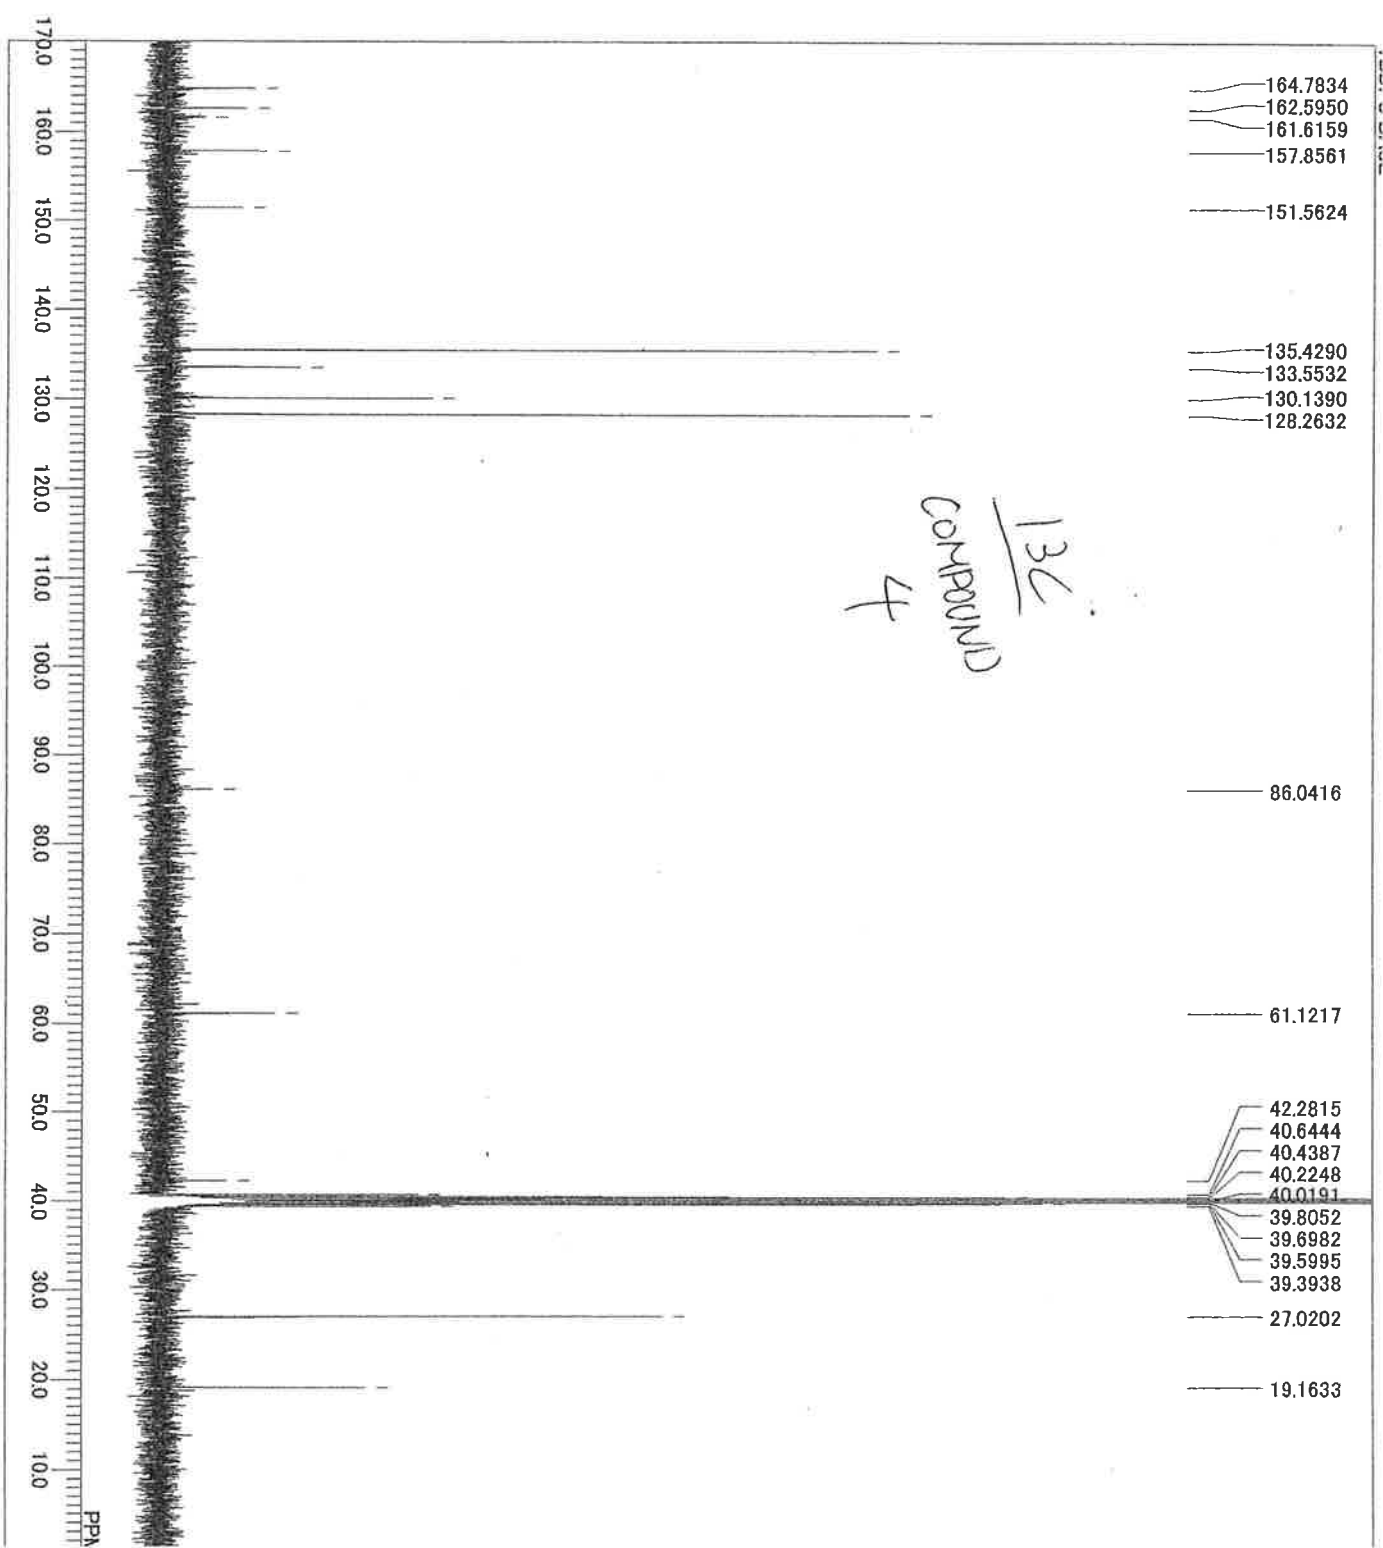

5  
COMPOUND  
1H

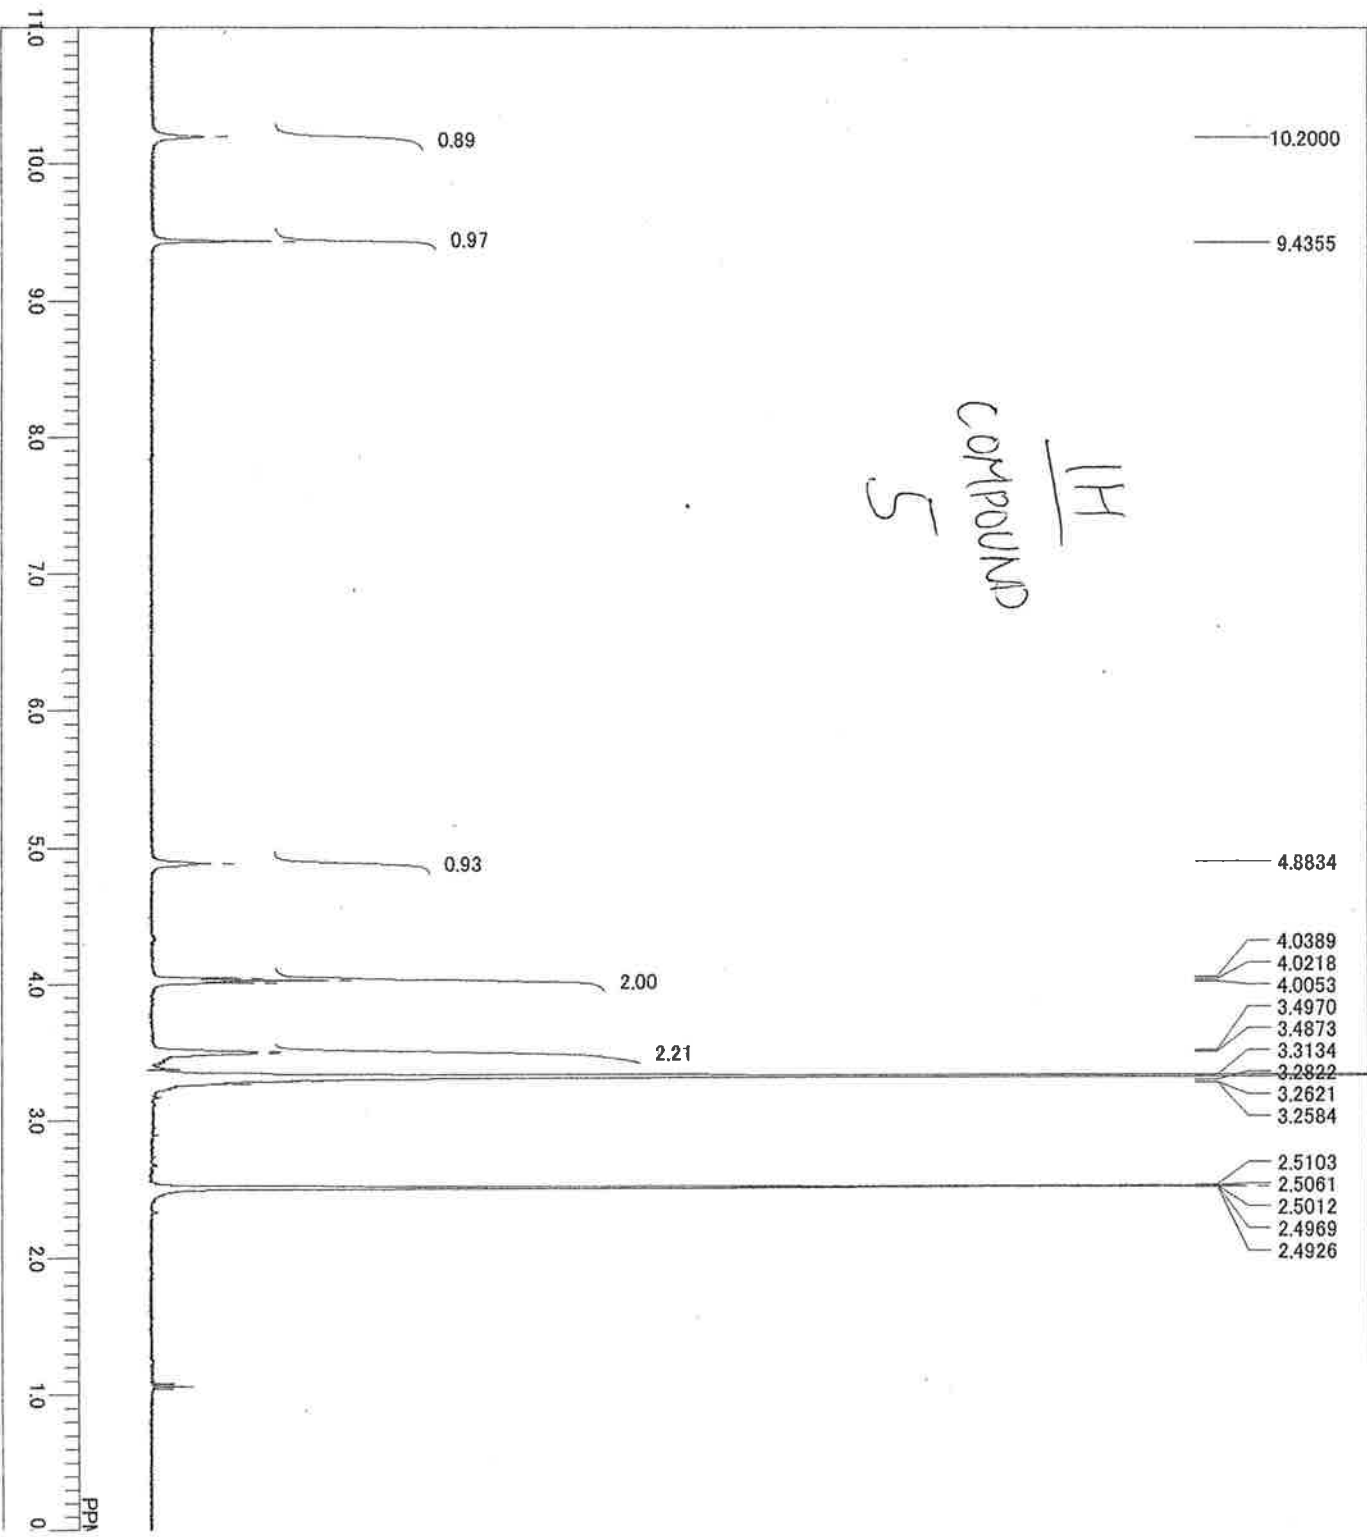

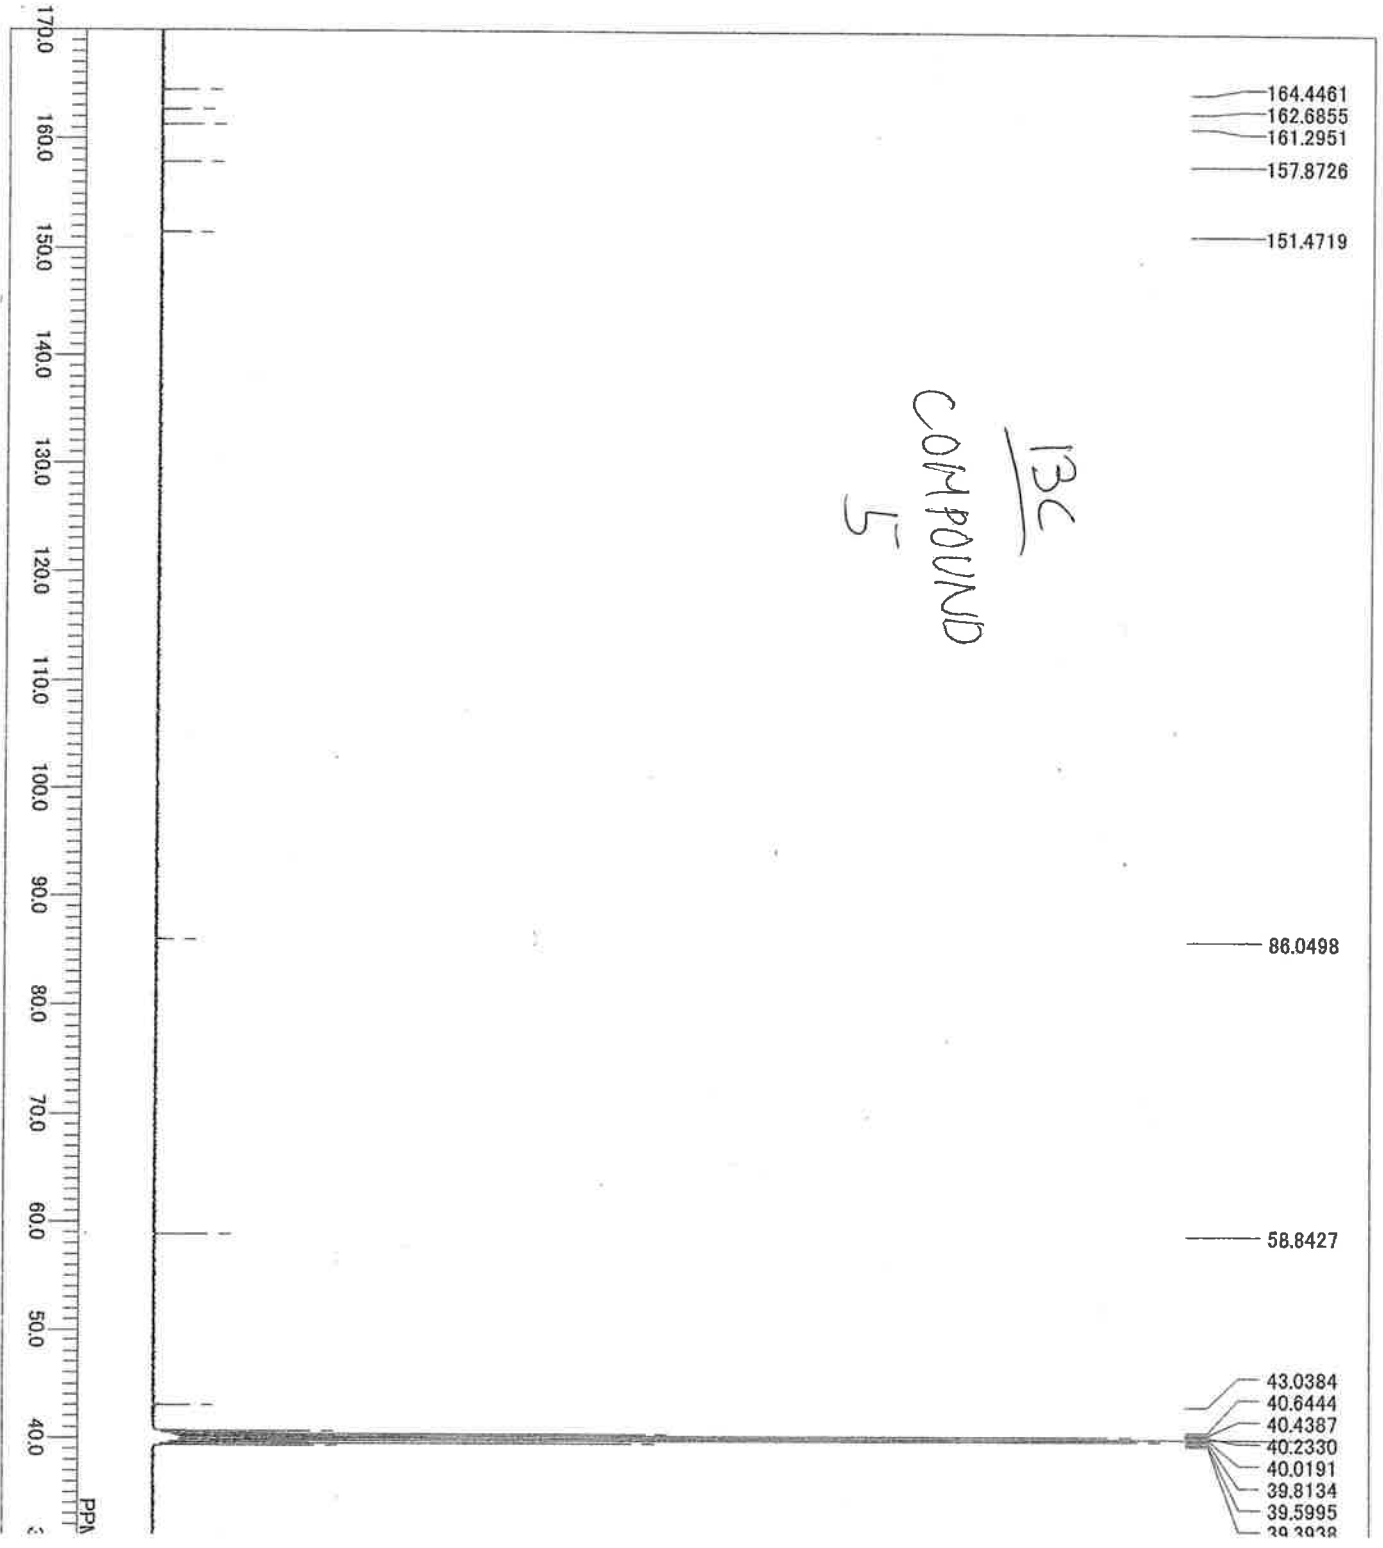



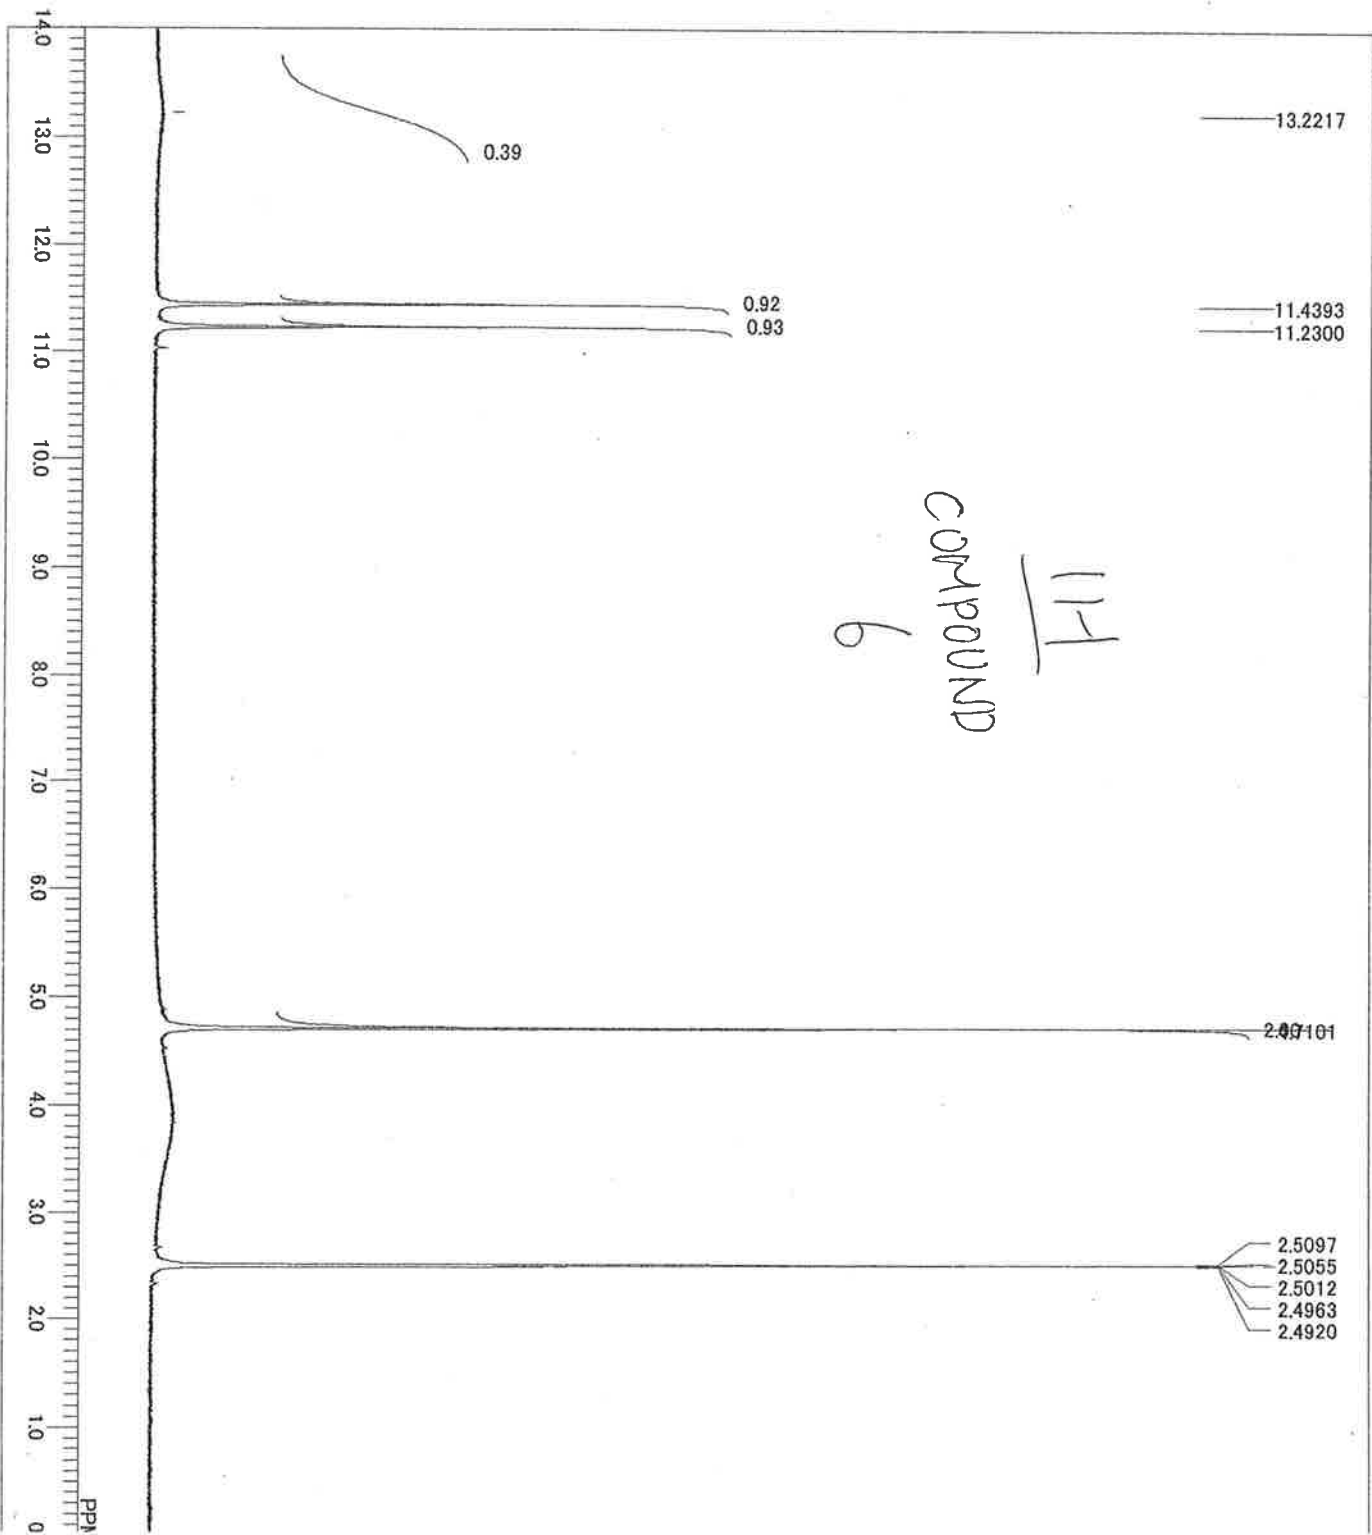

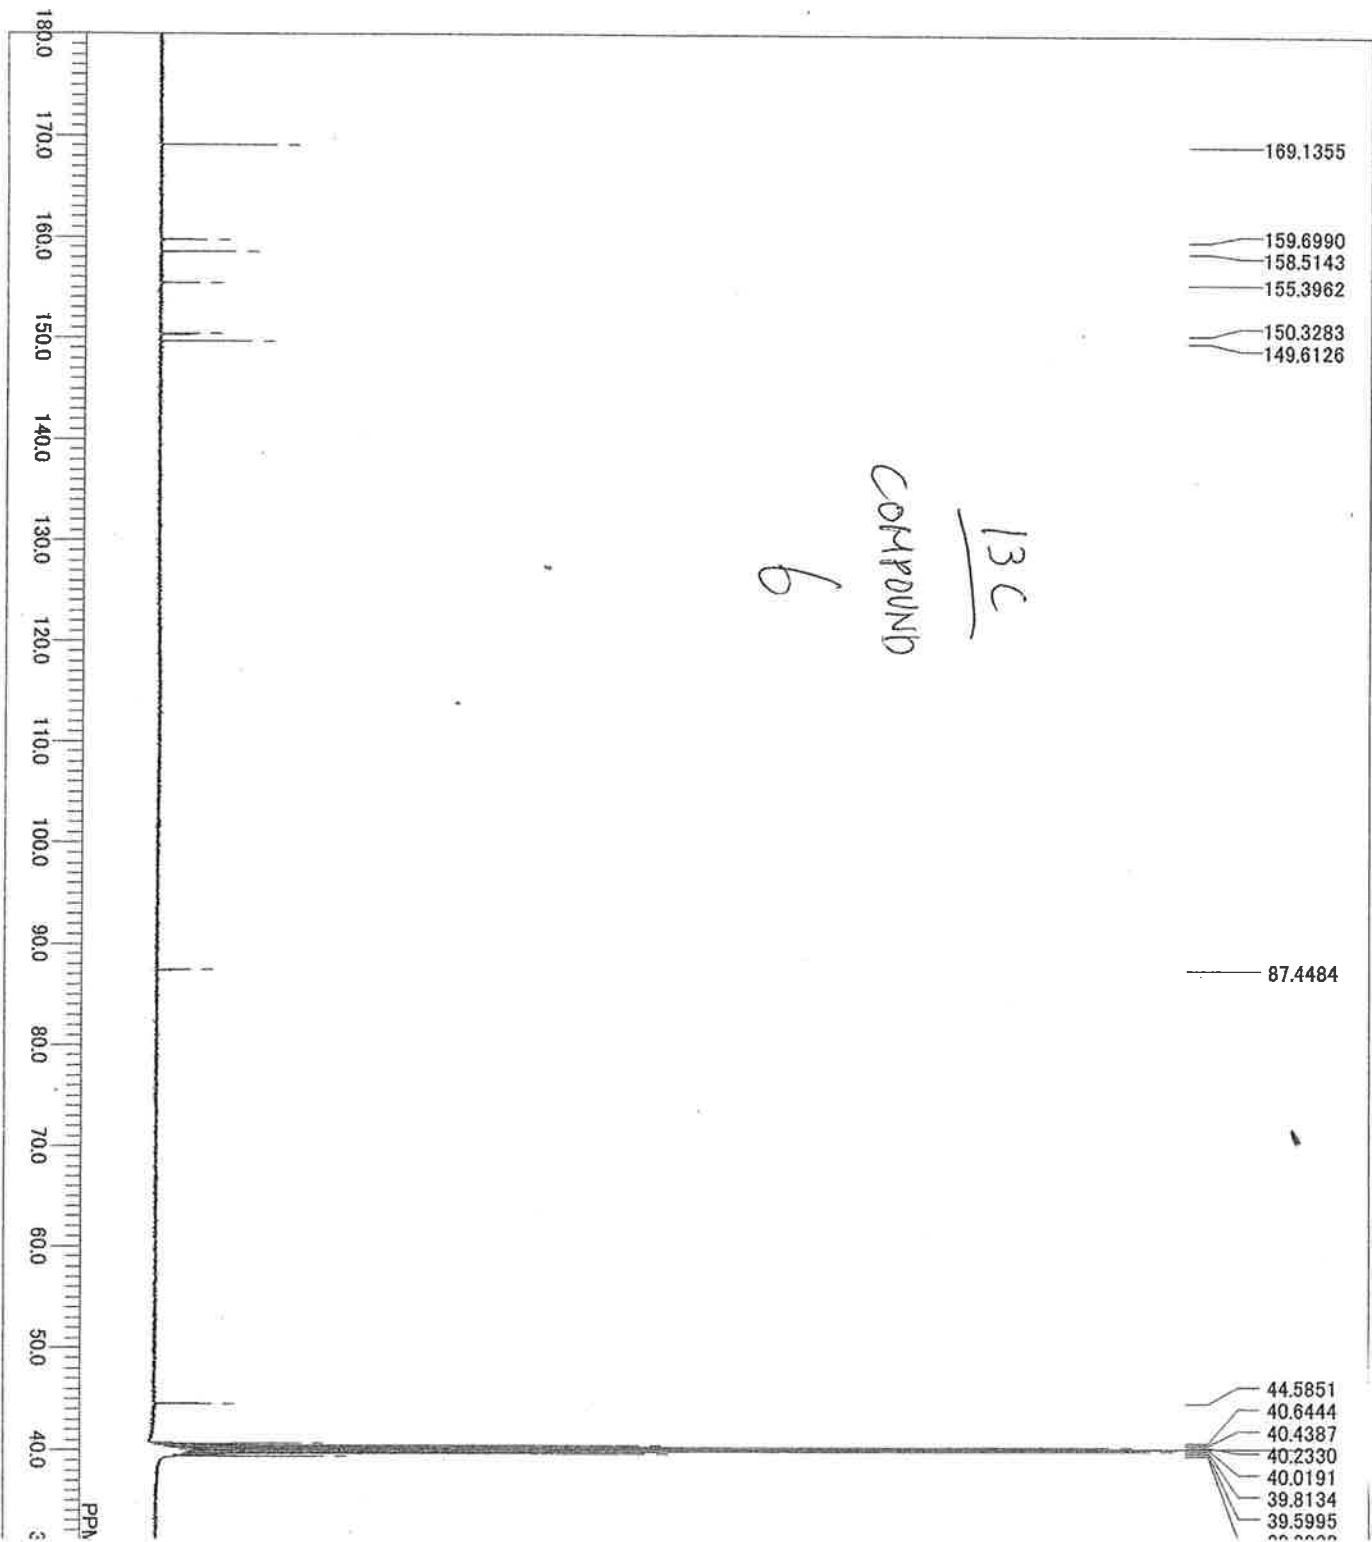

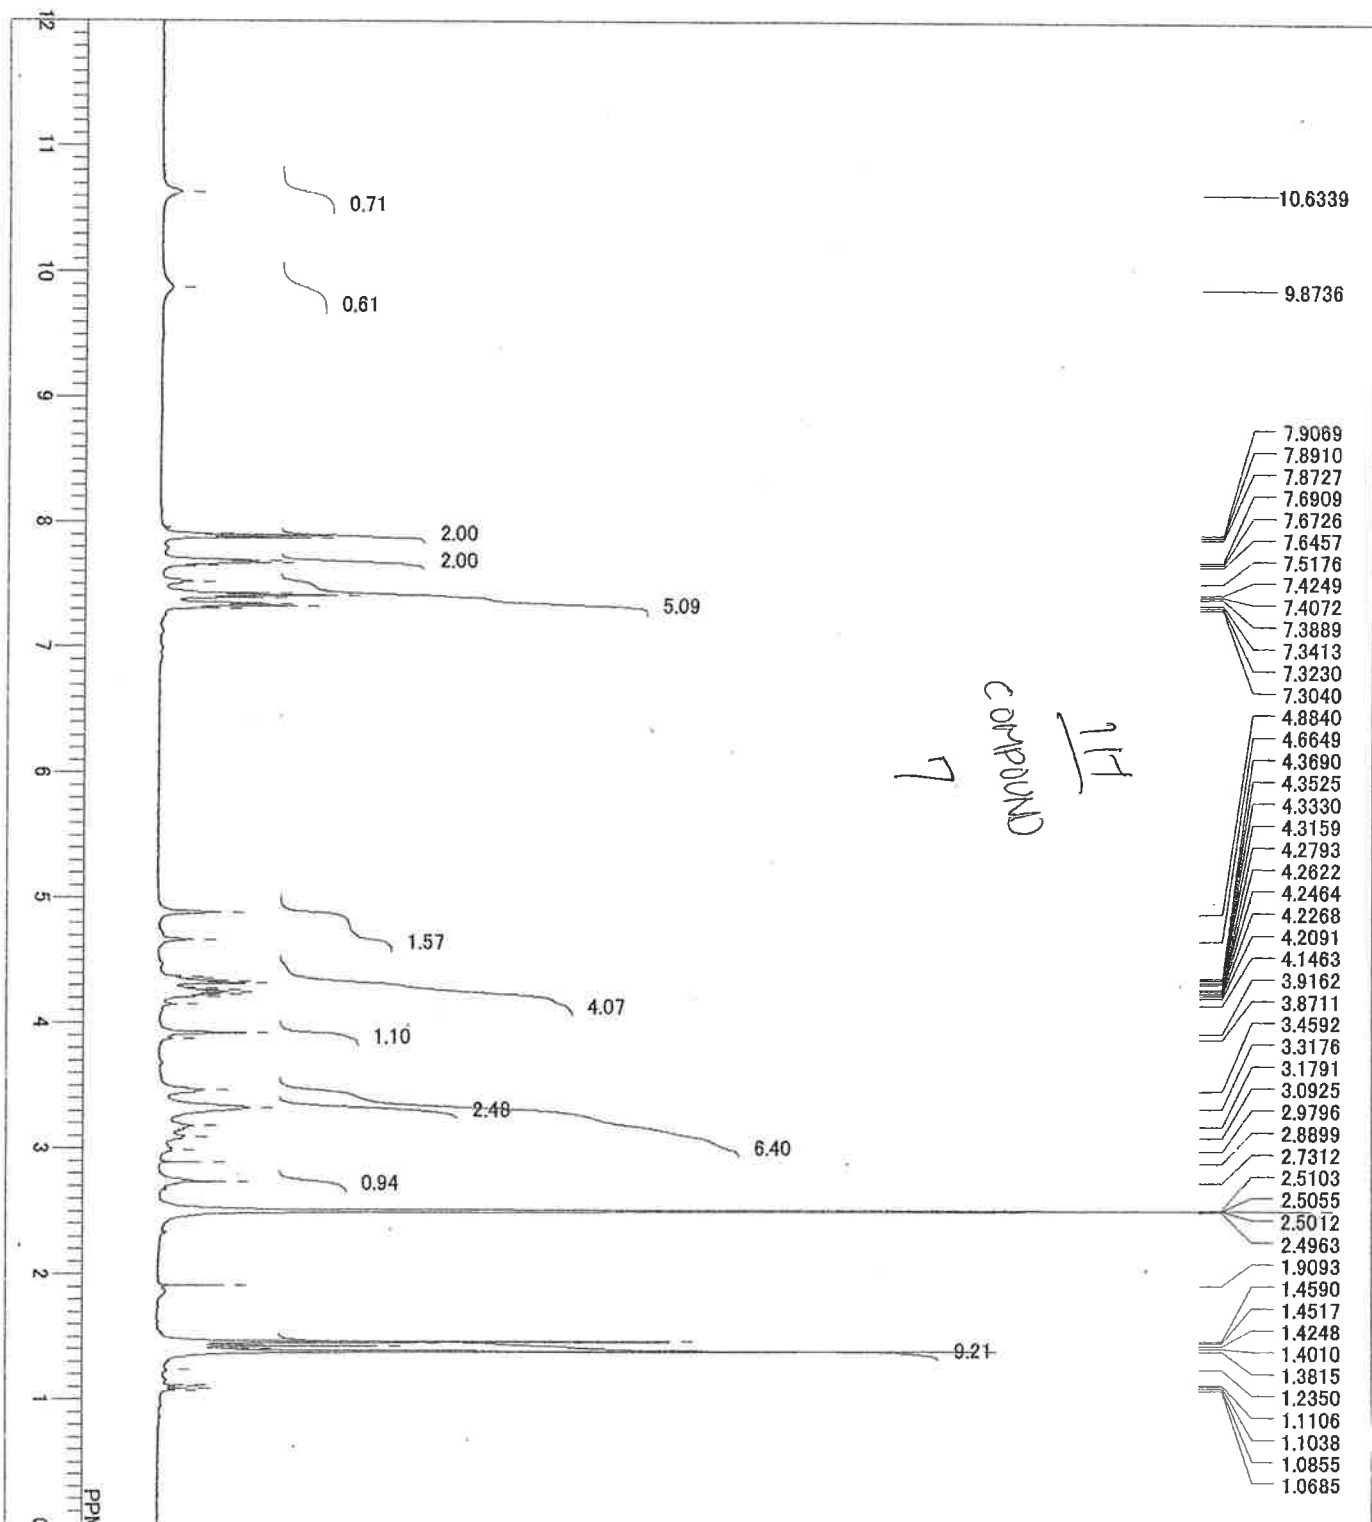

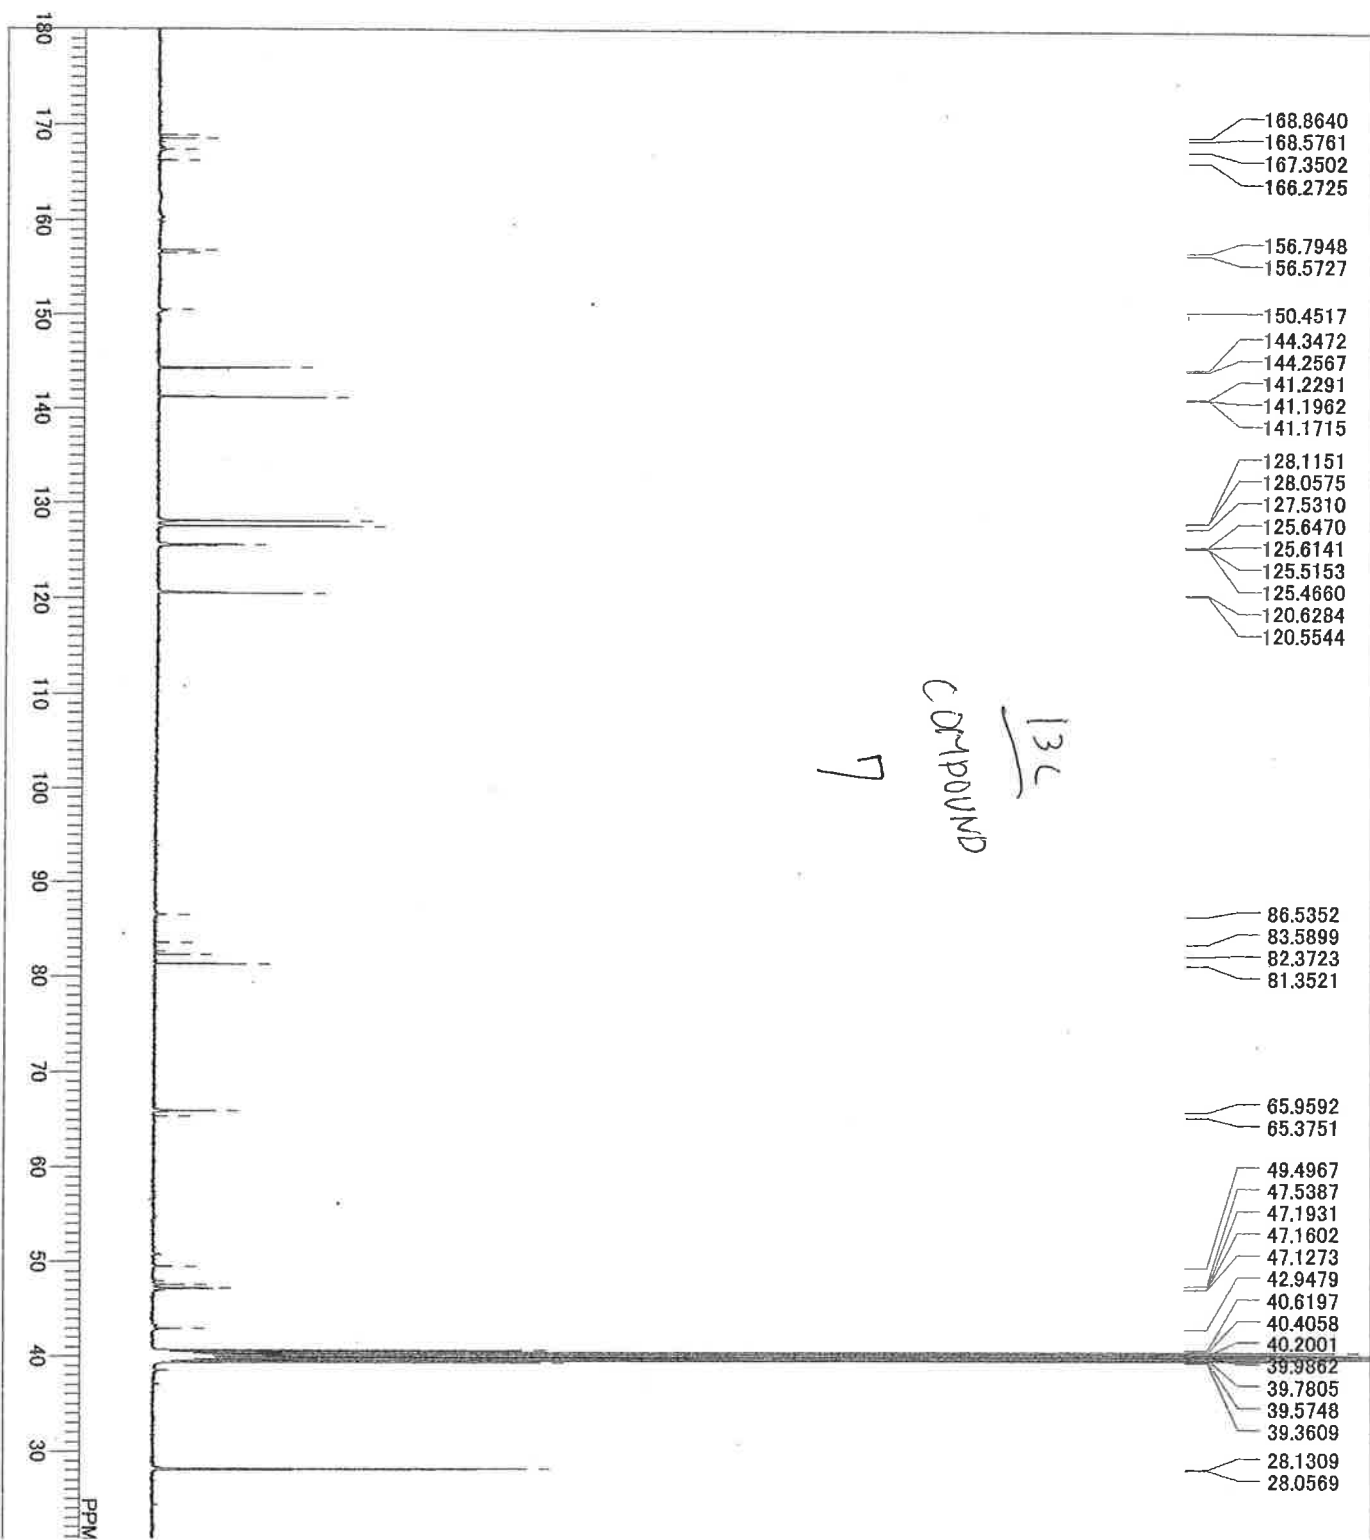

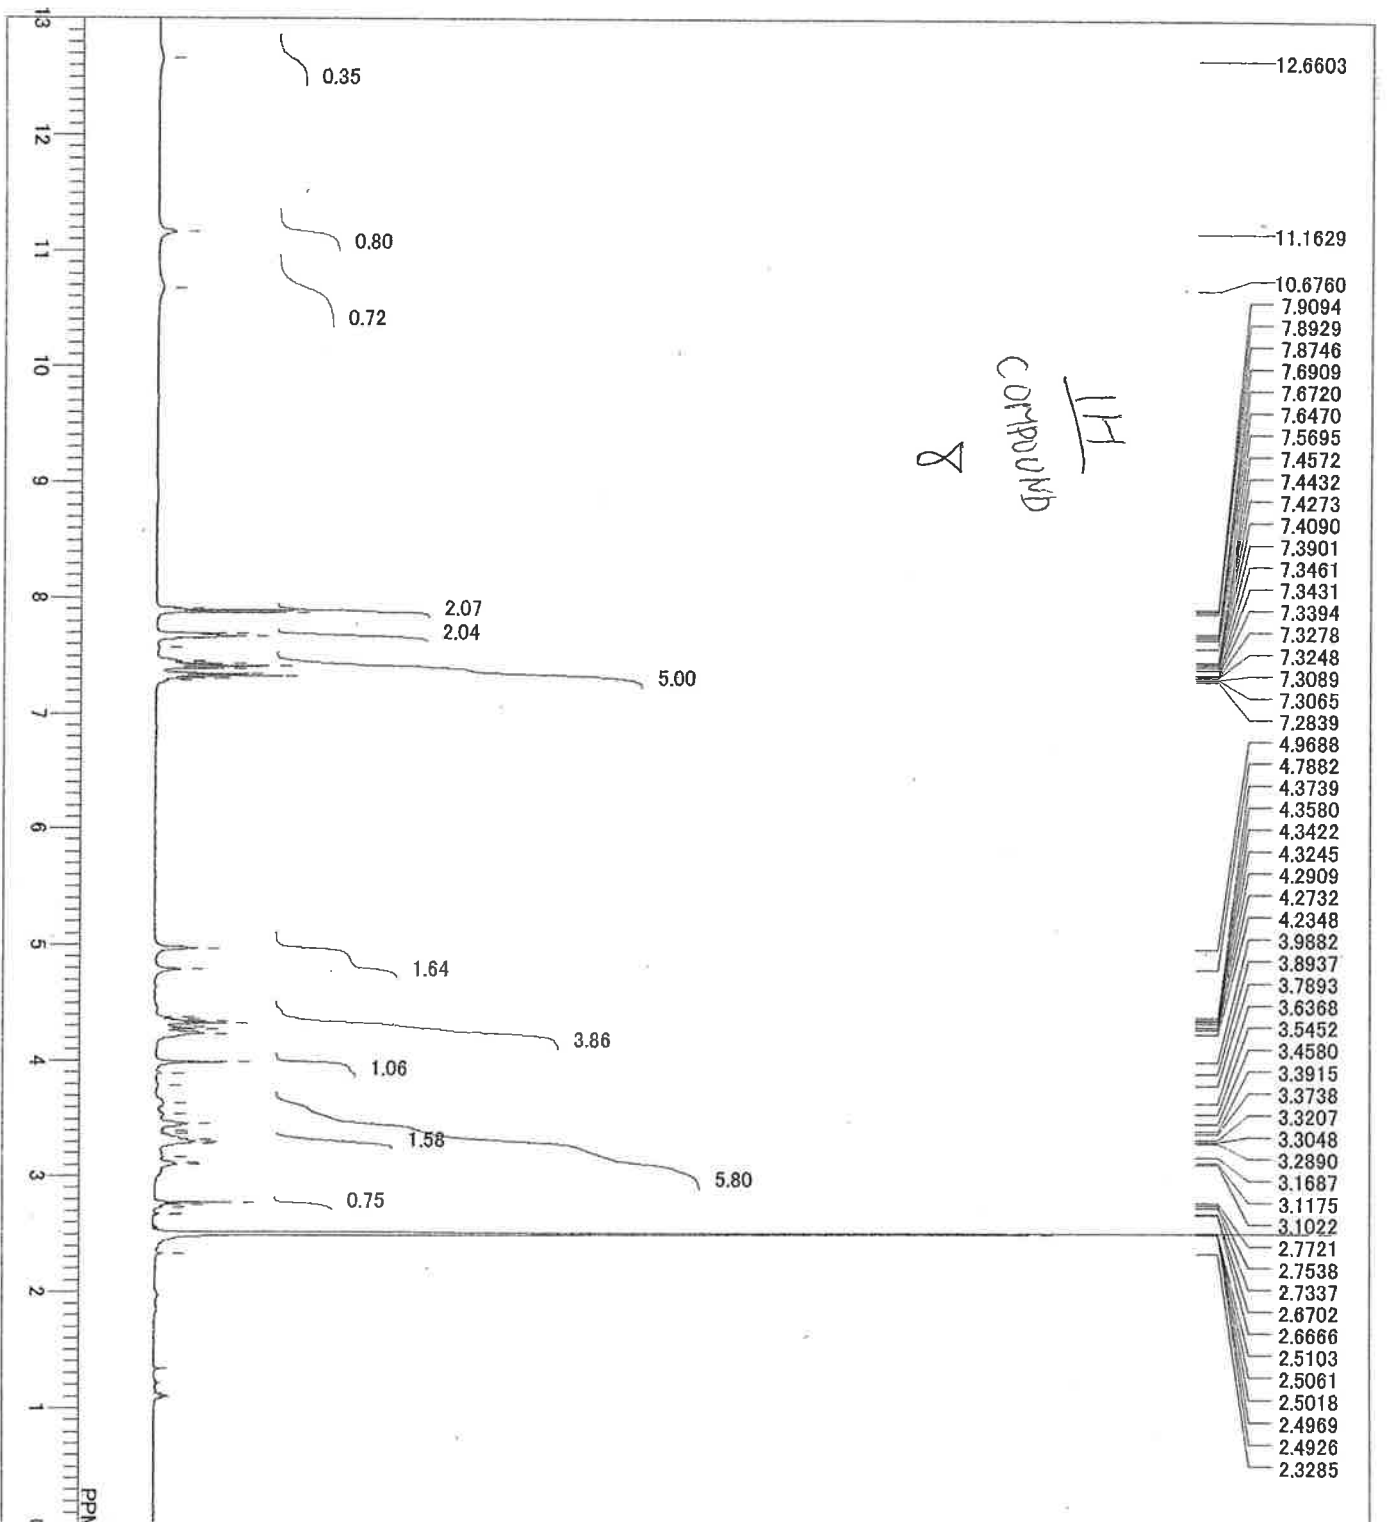

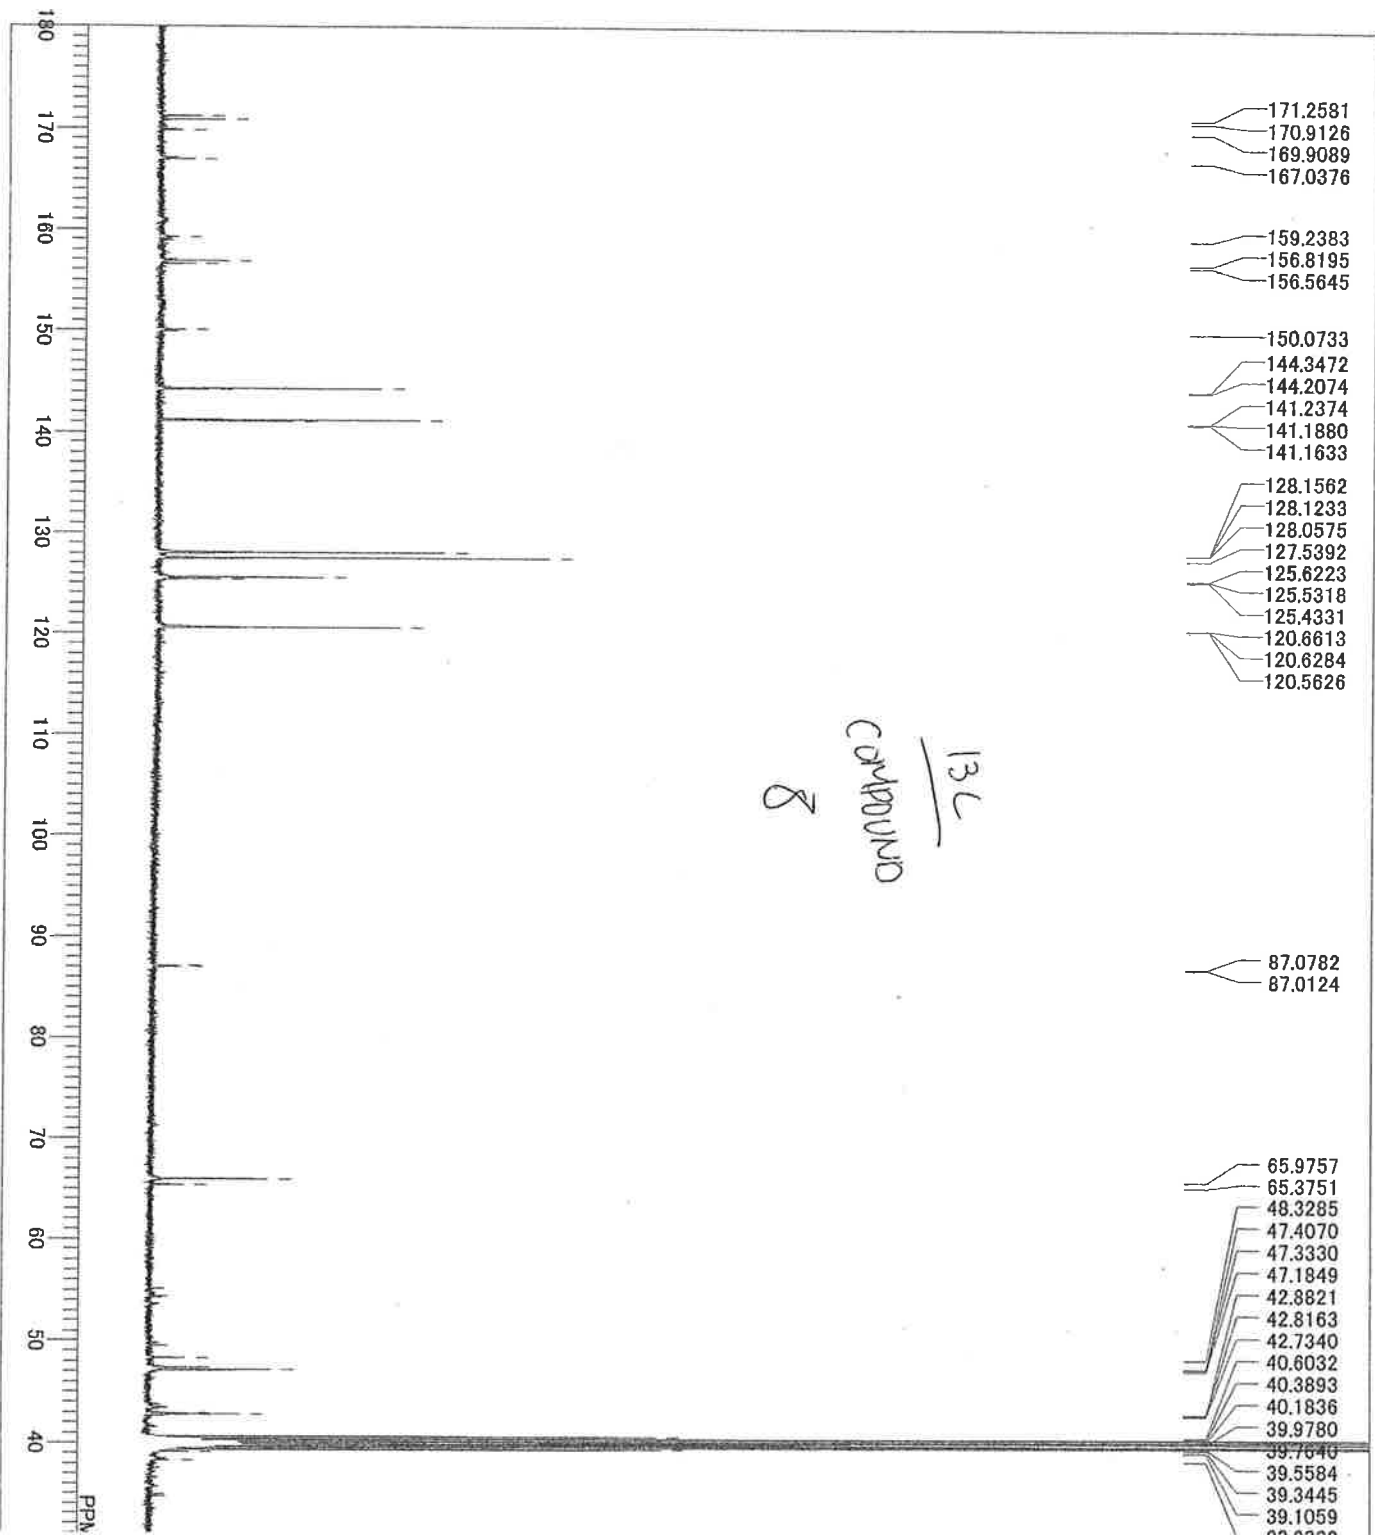

Supplement: b821193k.pdf [file b821193k.pdf]
